# Supplementary material for: Reasonable reasoning: multi-variate problem-solving in organic chemistry
Source: Royal Society of Chemistry journal article supplement (doi:10.1039/c0rp90003f), 2010-01-01

# Reasonable reasoning: multi-variate problem-solving in organic chemistry

Adam Kraft, Amanda M. Strickland, and Gautam Bhattacharyya

## Supplementary data

### Task 1 Solutions

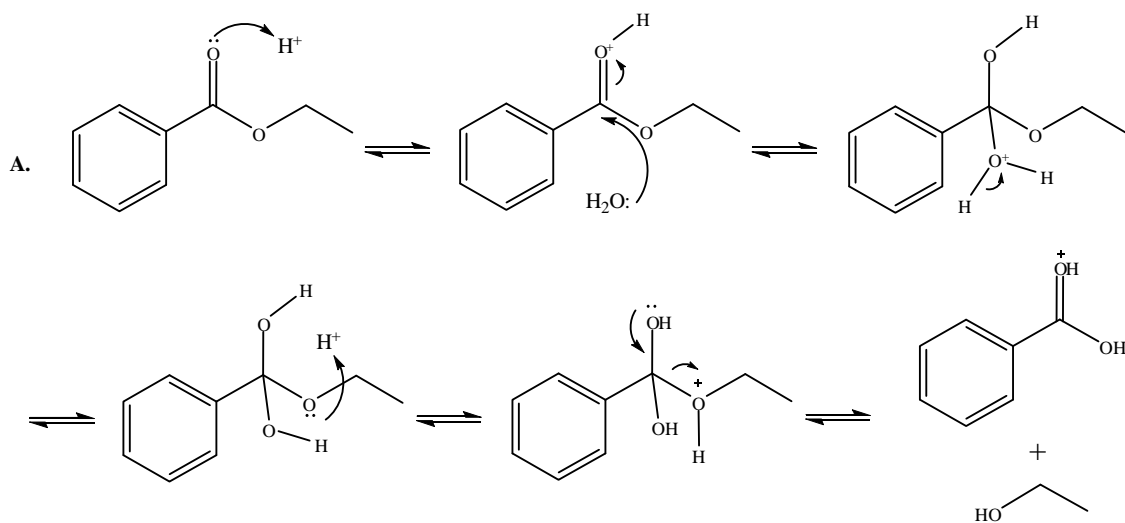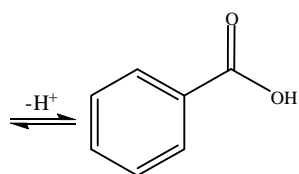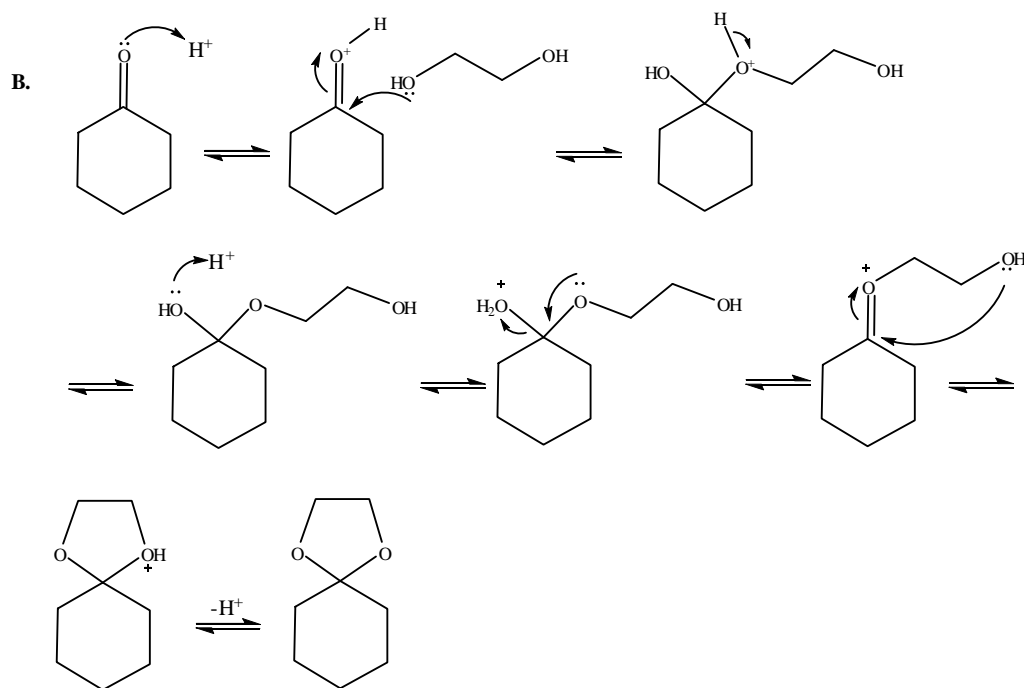

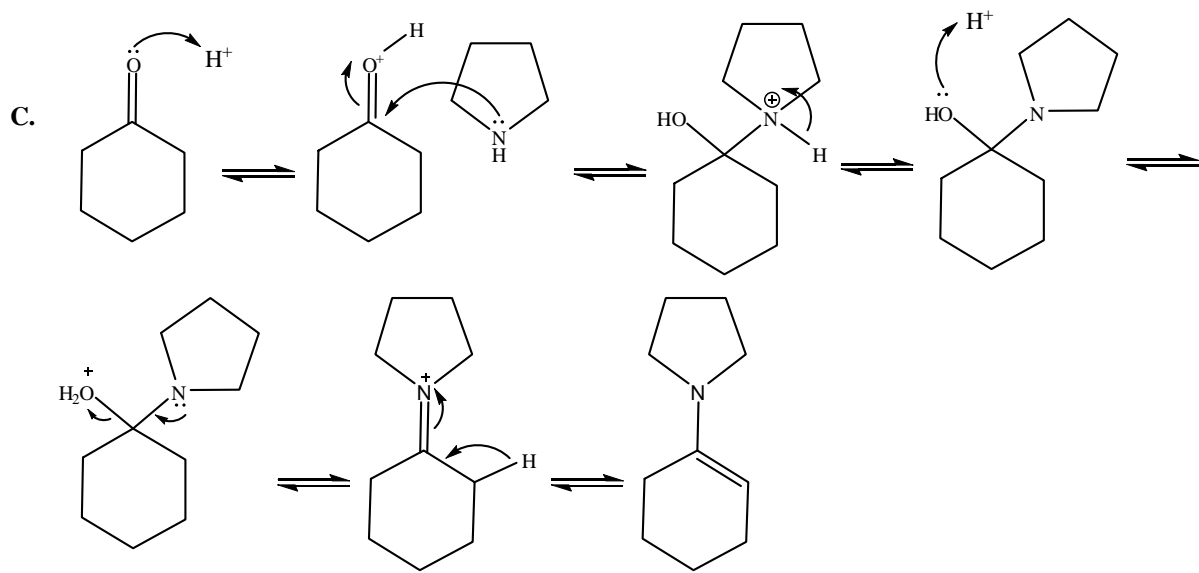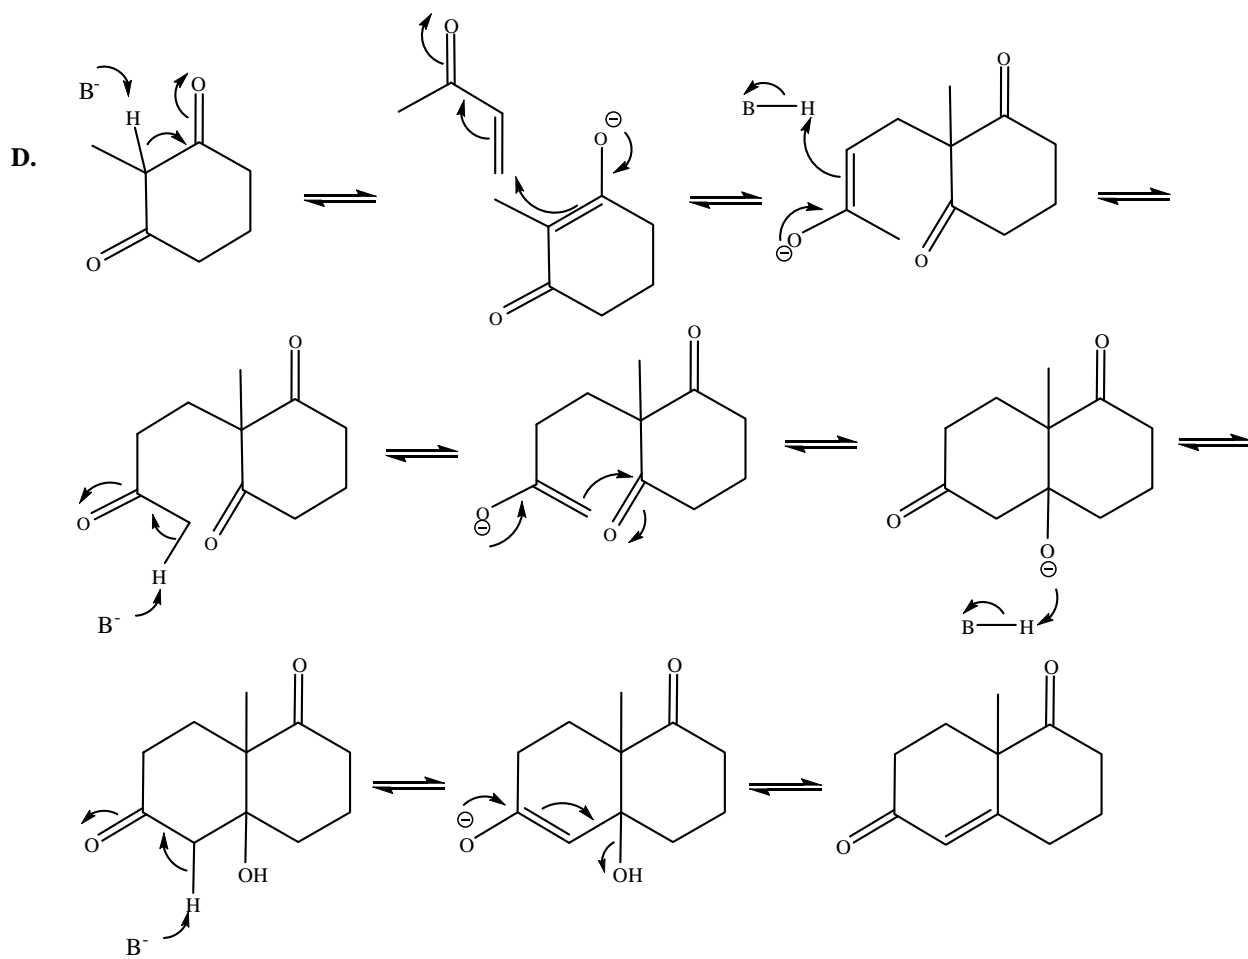

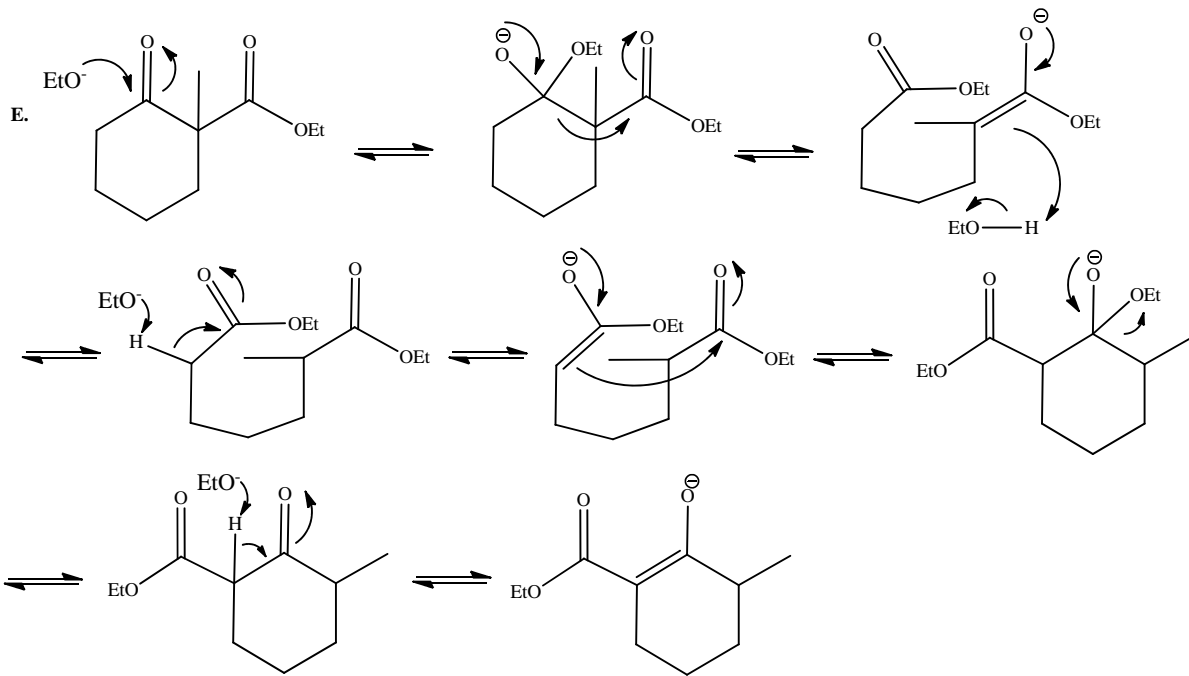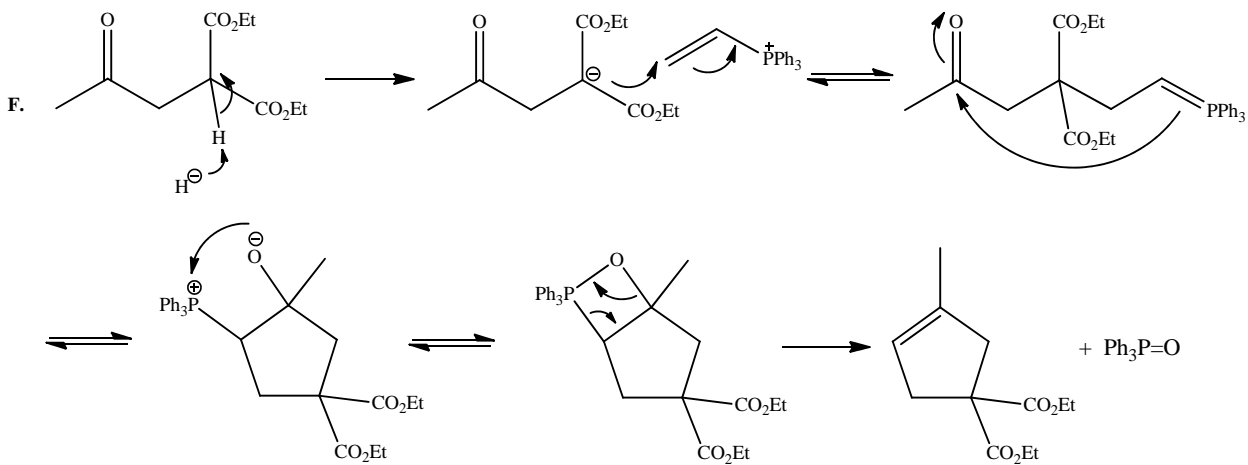

## Task 2 Solutions

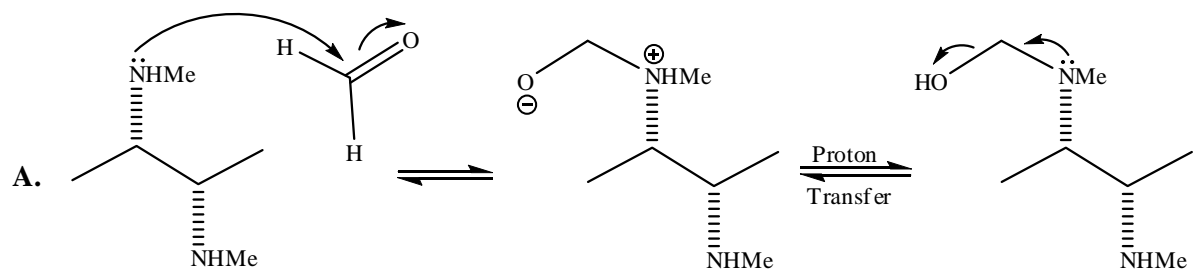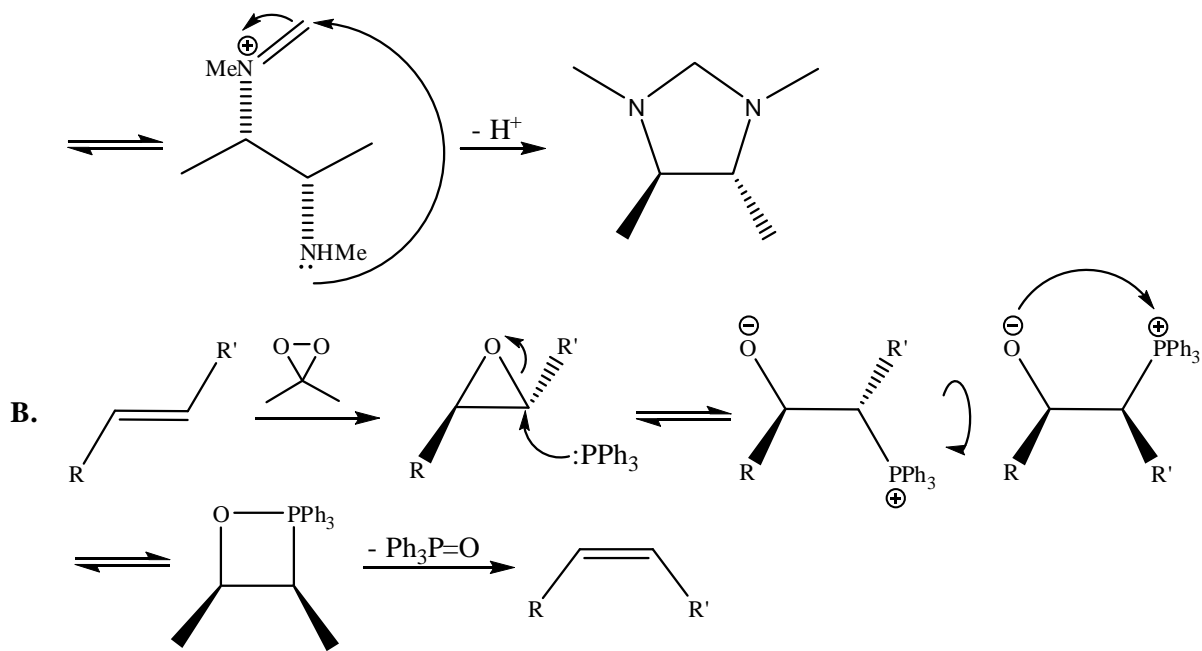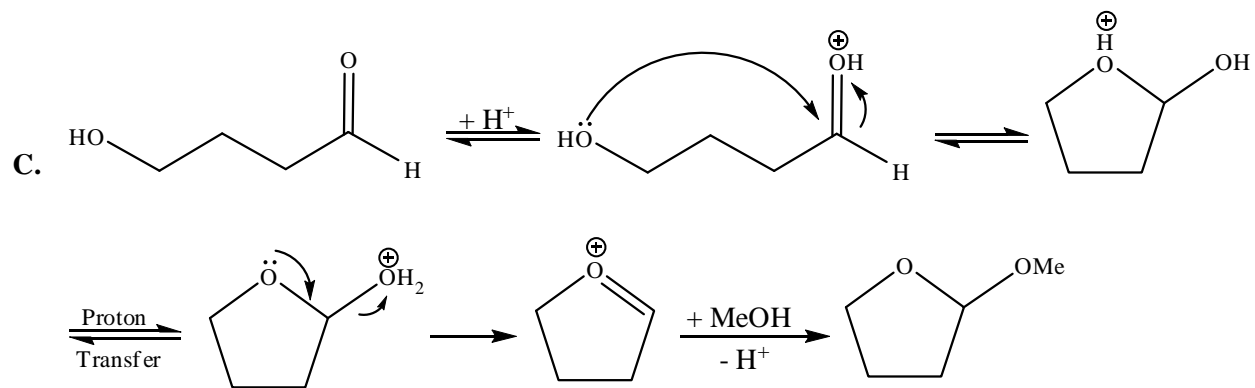

Supplement: c0rp90003fesi.pdf [file c0rp90003fesi.pdf]
